# Supplementary material for: Degradation of norfloxacin by copper-doped Bi2WO6-induced sulfate radical-based visible light-Fenton reaction
Source: Royal Society of Chemistry journal article supplement (doi:10.1039/d0ra07378d), 2020-01-01

## Supplementary Material

### **Degradation of norfloxacin by sulfate radical-based visible light-Fenton by copper-doped Bi<sub>2</sub>WO<sub>6</sub>**

Xin Zhong<sup>1,2,\*</sup>, Wen-Ting Wu<sup>1</sup>, Hao-Nan Jie<sup>1</sup>, Wang-Ye Tang<sup>1</sup>, Dan-Yan Chen<sup>1</sup>, Tao Ruan<sup>1</sup>, He-ping Bai<sup>1,2</sup>

1. Department of Environmental Engineering and Science, Beijing Normal University, Zhuhai, Zhuhai, China;

2. College of Education for the Future, Beijing Normal University at Zhuhai, Zhuhai, China.

\*Correspondence: zhongxin@bnu.edu.cn; Tel.: (+86-(0)756-3683012) (X. Zhong)

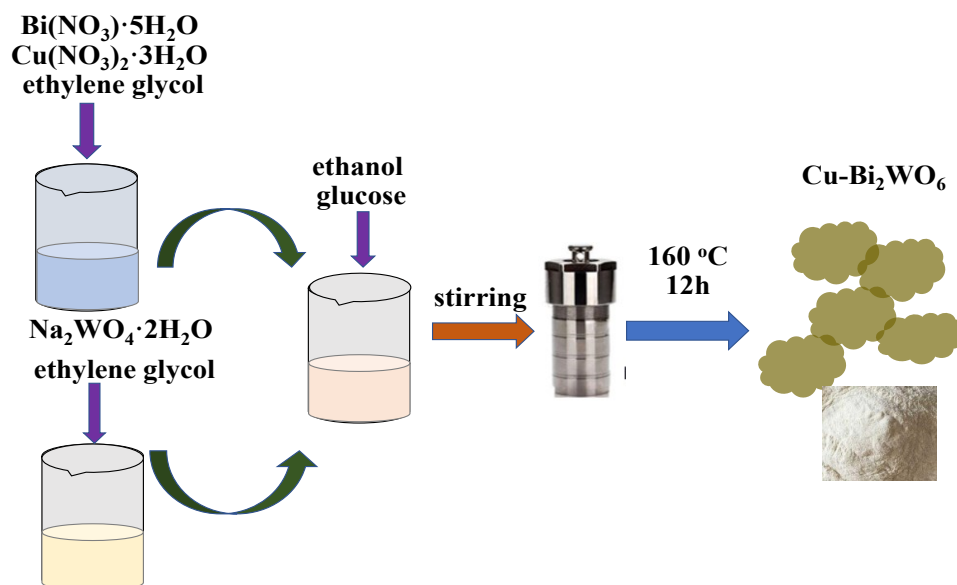

Figure S1 Schematic diagram of  $\text{Cu-Bi}_2\text{WO}_6$  synthesis process.

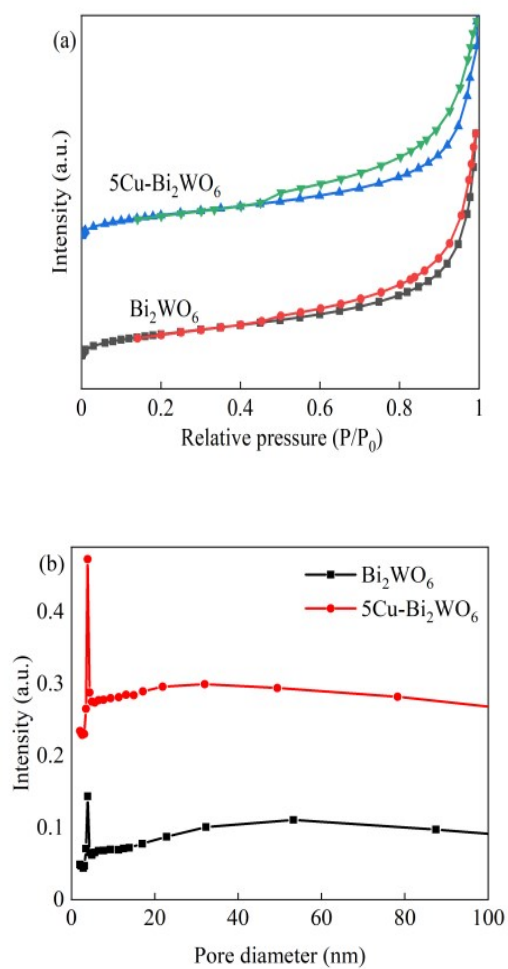

Figure S2 (a)  $\text{N}_2$  adsorption-desorption isotherms and (b) pore size distribution of  $\text{Bi}_2\text{WO}_6$  and  $5\text{Cu-Bi}_2\text{WO}_6$ .

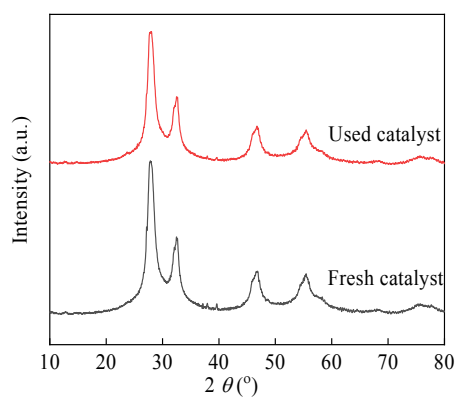

Figure S3 XRD spectra of  $5\text{Cu-Bi}_2\text{WO}_6$  before and after reaction.

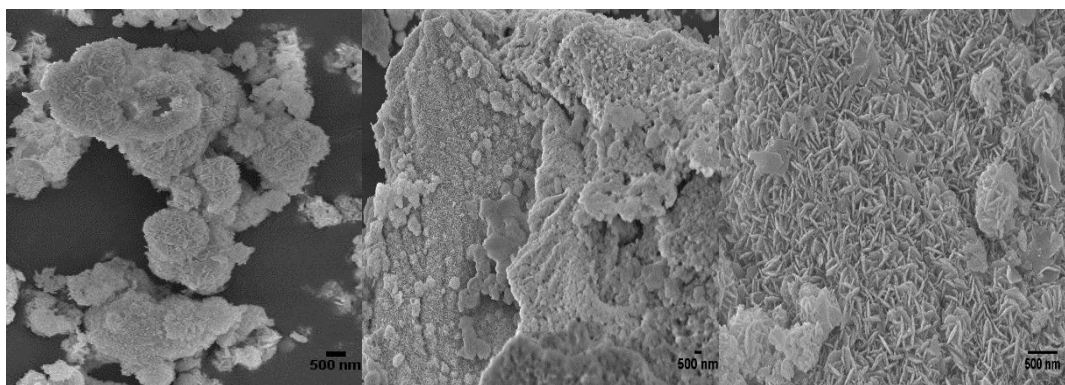

Figure S4 SEM images of  $5\text{Cu-Bi}_2\text{WO}_6$  after reaction.

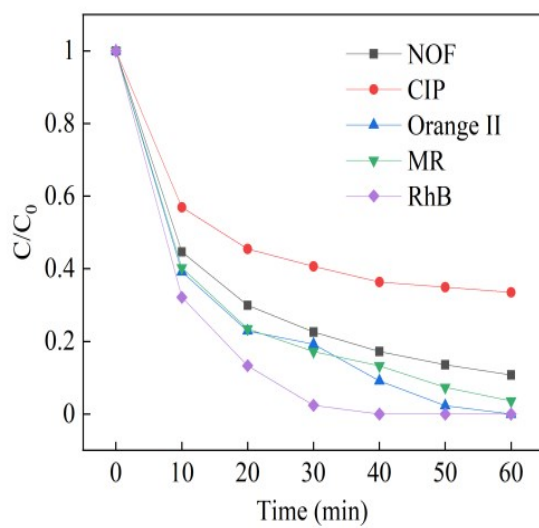

Figure S5 Degradation of different contaminant by  $5\text{Cu-Bi}_2\text{WO}_6$ .

Table S1 Studies on of photocatalysts in the catalyst/PMS/PS/Vis reactions

| No.       | Systems                                                       | Light source     | Target pollutant                    | Reaction time and efficiency   | Operation parameters                                                          |
|-----------|---------------------------------------------------------------|------------------|-------------------------------------|--------------------------------|-------------------------------------------------------------------------------|
| 1         | PMS/CuBi <sub>2</sub> O <sub>4</sub> /VL                      | 300W xenon lamp  | TC 50 mg/L                          | Nearly complete removal 60 min | [PMS]= 0.125 mg/mL<br>[catalyst]=0.5 g/L                                      |
| 2         | PMS/Co-BiVO <sub>4</sub> /VL                                  | xenon lamp       | Tetracycline hydrochloride 40 mg/L  | Nearly complete removal 25 min | [PMS]= 5 mM<br>[catalyst]=0.2 g/L                                             |
| 3         | MIL-53(Fe)/PS/VL                                              | 300W xenon lamp  | tetracycline hydrochloride 300 mg/L | 99.6% TC 60 min                | [PMS]= 8 mM<br>[catalyst]=0.2 g/L                                             |
| 4         | solar/MOFs@COFs/PS                                            | 500 W Xenon lamp | bisphenol A 50 mg/L                 | 82% 120 min                    | [PMS]= 0.5 g /L<br>[catalyst]=0.25 g/L                                        |
| 5         | Vis/TiO <sub>2</sub> /PMS                                     | 300 W Xenon lamp | Perfluorooctanoic 50 mg/L           | 100% 9 h                       | [PMS]= 0.75 g L <sup>-1</sup><br>[TiO <sub>2</sub> ] = 0.25 g L <sup>-1</sup> |
| 6         | Vis/Fe(II)/V(IV) self-doped FeVO <sub>4</sub> /PMS            | 300 W Xenon lamp | Sulfamethoxazole 0.02 mM            | 96.6% 60 min                   | [catalyst] = 0.5 g L <sup>-1</sup> , [PMS] = 0.406 mM                         |
| 7         | Vis/MoS <sub>2</sub> /Ag/g-C <sub>3</sub> N <sub>4</sub> /PMS | 300 W Xenon lamp | Tetracycline 20 mg/L                | 79.7% 50 min                   | [PMS]= 0.1 mM<br>[catalyst]=0.2 g/L                                           |
| 8         | Vis/ Fe/C <sub>3</sub> N <sub>4</sub> /PS                     | 350 W Xenon lamp | rhodamine B 20 mg/L                 | 100% 40 min                    | [catalyst] = 400 ppm, [PS] = 3 mM<br>pH = 3.5                                 |
| This work | Cu-Bi <sub>2</sub> WO <sub>6</sub> +Vis+PMS                   | 30 W LED lamp    | Norfloxacin 20 mg/L                 | 89.27% 60 min                  | [catalyst]=0.5 g/L<br>[PS]=0.4 mM<br>Neutral pH                               |

[1] J. Zhang, C. Zhai, W. Zhao, Y. Chen, R. Yin, L. Zeng, M. Zhu. Insight into combining visible-light photocatalysis with transformation of dual metal ions for enhancing peroxymonosulfate activation over dibismuth copper oxide. *Chemical Engineering Journal*, 2020, 397, 125310.

[2] Xin Chen, Jiabin Zhou, Tianlei Zhang, Lidan Din. Enhanced degradation of tetracycline hydrochloride using photocatalysis and sulfate radical-based oxidation processes by Co/BiVO<sub>4</sub> composites. *Journal of Water Process Engineering*, 2019, 32, 100918.

[3] Ying Zhang, Jiabin Zhou, Junhui Chen, Xiaoqiong Feng, Weiquan Cai. Rapid degradation of tetracycline hydrochloride by heterogeneous photocatalysis coupling persulfate oxidation with MIL-53(Fe) under visible light irradiation. *Journal of Hazardous Materials*, 2020, 392, 122315.

[4] Shi-WenLv, Jing-MinLiu, Chun-Yang Li, Ning Zhao, Zhi-Hao Wang, Shuo Wang. Two novel MOFs@COFs hybrid-based photocatalytic platforms coupling with sulfate radical-involved advanced oxidation processes for enhanced degradation of bisphenol A. *Chemosphere*, 2020, 243, 125378.

[5] Bentuo Xu, Mohammad Boshir Ahmed, John L. Zhou, Ali Altaee. Visible and UV photocatalysis of aqueous perfluorooctanoic

acid by TiO<sub>2</sub> and peroxymonosulfate: Process kinetics and mechanistic insights. *Chemosphere*, 2020, 243, 125366.

[6] Junlei Zhang, Wei Zhao, Zhi Li, Gang Lu, Mingshan Zhu. Visible-light-assisted peroxymonosulfate activation over Fe(II)/V(IV) self-doped FeVO<sub>4</sub> nanobelts with enhanced sulfamethoxazole degradation: Performance and mechanism. *Chemical Engineering Journal*, 2021, 403, 126384.

[7] Chongyue Jin, Jin Kang, Zhilin Li, Min Wang, Zengmin Wu, Yuanhua Xie. Enhanced visible light photocatalytic degradation of tetracycline by MoS<sub>2</sub>/Ag/g-C<sub>3</sub>N<sub>4</sub> Z-scheme composites with peroxymonosulfate. *Applied Surface Science*, 514, 2020, 146076.

[8] Hamed Heidarpour, Mohsen Padervand, Mohammad Soltanieh, Manouchehr Vossoughi. Enhanced decolorization of rhodamine B solution through simultaneous photocatalysis and persulfate activation over Fe/C<sub>3</sub>N<sub>4</sub> photocatalyst. *Chemical Engineering Research and Design*, 2020, 153, 709-720.

Table S2 Possible intermediates of NOF during the reaction

| Name | m/z     | Structure                                                                            |
|------|---------|--------------------------------------------------------------------------------------|
| NOF  | m/z=320 | 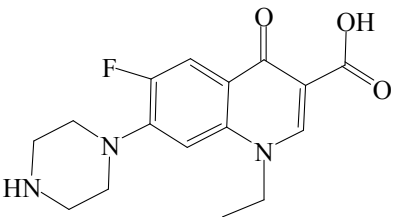  |
| N1   | m/z=350 |  |
| N2   | m/z=336 |  |
| N3   | m/z=322 |  |

---

N4

m/z=294

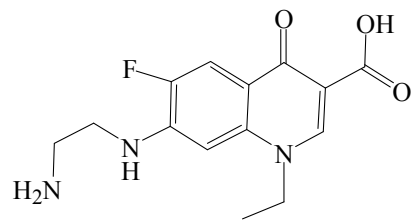

N5

m/z=279

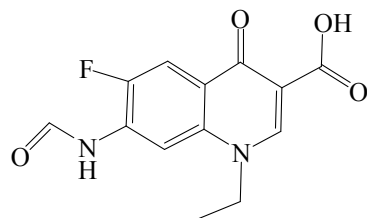

N6

m/z=251

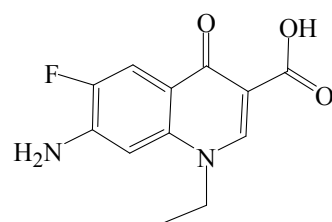

N7

m/z=233

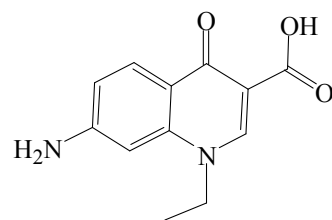

N8

m/z=304

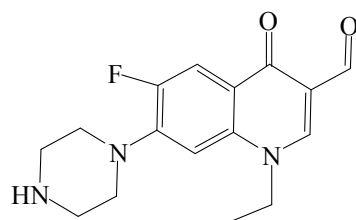

N9

m/z=276

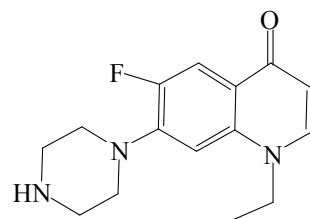

N10

m/z=302

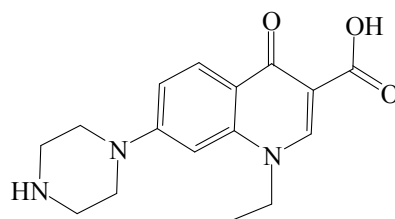

---

N11

m/z=318

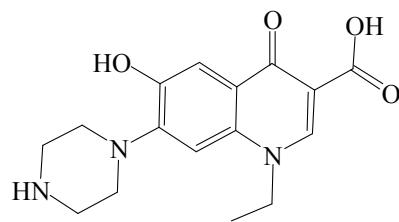

N12

m/z=274

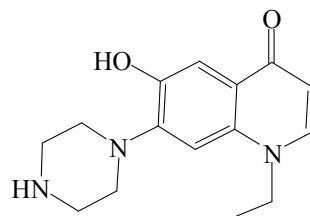

N13

m/z=352

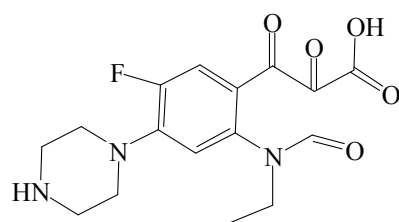

N14

m/z=302

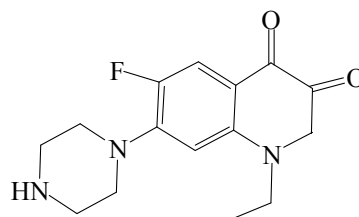

Supplement: d0ra07378d1.pdf [file d0ra07378d1.pdf]
